# Paeoniflorin Protects against Ischemia-Induced Brain Damages in Rats via Inhibiting MAPKs/NF- $\kappa$ B-Mediated Inflammatory Responses

Ruo-Bing Guo<sup>1</sup>✉, Guo-Feng Wang<sup>2</sup>✉, An-Peng Zhao<sup>1</sup>, Jun Gu<sup>1</sup>, Xiu-Lan Sun<sup>1\*</sup>, Gang Hu<sup>1\*</sup>

**1** Jiangsu Key Laboratory of Neurodegeneration, Department of Pharmacology, Nanjing Medical University, Nanjing, China, **2** Department of Cadre Ward No. 3, the General Hospital of Jinan Military Area Command of PLA, Jinan, China

## Abstract

Paeoniflorin (PF), the principal component of *Paeoniae Radix* prescribed in traditional Chinese medicine, has been reported to exhibit many pharmacological effects including protection against ischemic injury. However, the mechanisms underlying the protective effects of PF on cerebral ischemia are still under investigation. The present study showed that PF treatment for 14 days could significantly inhibit transient middle cerebral artery occlusion (MCAO)-induced over-activation of astrocytes and microglia, and prevented up-regulations of pro-inflammatory mediators (TNF $\alpha$ , IL-1 $\beta$ , iNOS, COX<sub>2</sub> and 5-LOX) in plasma and brain. Further study demonstrated that chronic treatment with PF suppressed the activations of JNK and p38 MAPK, but enhanced ERK activation. And PF could reverse ischemia-induced activation of NF- $\kappa$ B signaling pathway. Moreover, our *in vitro* study revealed that PF treatment protected against TNF $\alpha$ -induced cell apoptosis and neuronal loss. Taken together, the present study demonstrates that PF produces a delayed protection in the ischemia-injured rats via inhibiting MAPKs/NF- $\kappa$ B mediated peripheral and cerebral inflammatory response. Our study reveals that PF might be a potential neuroprotective agent for stroke.

**Citation:** Guo R-B, Wang G-F, Zhao A-P, Gu J, Sun X-L, et al. (2012) Paeoniflorin Protects against Ischemia-Induced Brain Damages in Rats via Inhibiting MAPKs/NF- $\kappa$ B-Mediated Inflammatory Responses. PLoS ONE 7(11): e49701. doi:10.1371/journal.pone.0049701

**Editor:** Cesar V. Borlongan, University of South Florida, United States of America

**Received:** May 5, 2012; **Accepted:** October 12, 2012; **Published:** November 14, 2012

**Copyright:** © 2012 Guo et al. This is an open-access article distributed under the terms of the Creative Commons Attribution License, which permits unrestricted use, distribution, and reproduction in any medium, provided the original author and source are credited.

**Funding:** This study was supported by grants from the National Natural Science Foundation of China (No. 81273495), Major Project of Jiangsu Provincial Department of Education (No. 12KJA310002), National Key Basic Research Program of China (No. 2009CB521906) and Project Funded by the Priority Academic Program Development of Jiangsu Higher Education Institutions (No. JX10131801042). The funders had no role in study design, data collection and analysis, decision to publish, or preparation of the manuscript.

**Competing Interests:** The authors have declared that no competing interests exist.

\* E-mail: xiulans@njmu.edu.cn (X-LS); ghu@njmu.edu.cn (GH)

✉ These authors contributed equally to this work.

## Introduction

Stroke has a high incidence and is harmful to human health. It is a leading cause of death and the third cause of disability. The loss of neurological functions following stroke is caused by massive loss of neurons resulting from hypoxic-ischemic insults. Up to now, several hypotheses have been put forward, such as Ca<sup>2+</sup> overload, oxidative injury, excitotoxicity and apoptosis [1]. A complex interplay between different factors and signal cascades results in neuronal cell degeneration after ischemia [2–4]. Extensive loss of neurons as well as glia over-activations in ischemic brain are the characteristic pathological features of cerebral ischemia [5]. The acute neuronal damage is followed by a second round of neuronal injury that occurs hours to days after brain ischemia in the neighboring areas, which is called delayed neuronal death (DND) [6]. It is very important to study the mechanism underlying DND for prolonging the timescale of clinical treatment [7].

Much progress has been made in developing novel therapeutics to treat stroke, including glutamate receptor antagonists, calcium channel blockers, radical scavengers, and anti-apoptotic agents [8]. Despite many promising neuroprotective agents have been identified in extensive animal research, few has been translated into clinically effective therapies [9]. Tissue plasminogen activators (tPAs) are still the only agents approved by the Food and Drug

Administration (FDA). tPAs has limited applicability and is currently used in fewer than 5% of stroke victims [10], although there is now some evidence that the window of opportunity for tPA usage may be extended to 6 h after the event [11;12]. Therefore, arduous works should be directed at increasing efficacy and extending the treatment window for stroke.

Given the complex pathophysiology of stroke, it may be unrealistic to hope for a single “magic bullet” that will result in neuroprotection and rescue of damaged but not-yet-destroyed neurons [13]. To date, no single agent has been shown to improve stroke outcome in humans, and the current standard of care remains primarily supportive. The herb *Paeonia lactiflora* pall, which is known as “Shao Yao” in Chinese, has been used for more than 1,000 years in traditional Chinese medicine to treat cramp, pain, giddiness and congestion [14]. Paeoniflorin (PF), a monoterpene glucoside, is the principal bioactive component purified and extracted from the root of *Paeonia lactiflora* pall. It has been reported to exhibit many pharmacological effects such as anti-inflammation, anti-allergy, anti-hyperglycemia, analgesia [15], blocking neuromusculus [16] and enhancing cognition [17;18]. Previous studies indicated the protective effects of PF may be related to its abilities to prevent apoptosis [14], scavenge free radicals [19], adjust cerebral energy metabolism and nitric oxide formation [20], prevent thrombosis [21], block Na<sup>+</sup> channels,

activate adenosine A1 receptor [22;23] or facilitate the translocation of protein kinase C and glucose transporter [24]. These studies suggest that multitargets may be involved in PF-mediated protective effects. Regarding to the effects of PF in the cerebral ischemia, it has been reported that treatment with PF attenuated ischemia-induced pathological and behavioral changes as well as cognitive impairments [18;23;25–27]. However, the mechanisms underlying the protective effects of PF on cerebral ischemia are still under investigation. Therefore, the present study focused on evaluating the delayed protective effects of PF in the transient middle cerebral artery occlusion (MCAO) rat model, and revealing the signaling pathways involved in the actions of PF.

## Experimental Procedures

### 1. Animals

Male SD rats weighing 220–250 g were used in the present study. Animals were allowed to acclimatize for at least 7 days prior to experimentation. The animals were housed in individual cages under light-controlled conditions and at room temperature. Food and water were available *ad libitum*. All animals received care in compliance with the Guide for the Care and Use of Laboratory Animals published by the National Institutes of Health (NIH publication 80–23, revised 1996). The rats were randomly divided into the following 3 groups ( $n = 20$ – $25$  for each group): 1. MCAO groups: MCAO(90 min)+saline (2 ml.kg<sup>-1</sup>, *i.p.*, twice per day for 14 days); 2. PF groups: PF (5 mg.kg<sup>-1</sup>, *i.p.*, twice per day) was administered for 14 days after MCAO (90 min) and reperfusion 24 h. PF (purity>98.5%) was purchased from Nanjing ZeLang Medical Technology Co., LTD); 3. Sham group. Physiological parameters of rats were monitored continuously, and the temperature remains 37±1°C throughout the intraoperative period.

### 2. Establishment of transient MCAO

The experimental MCAO rat model was conducted as described previously (Takano *et al.*, 1997), with minor modifications. Briefly, the rats were anesthetized with choral hydrate (300 mg.kg<sup>-1</sup>, *i.p.*), the bifurcation of the left common carotid artery was exposed. The right MCA was occluded for 90 min by insertion of a monofilament nylon suture through the common carotid artery as described previously. Then, the suture was withdrawn allowing reperfusion.

### 3. Determination of neurological symptoms

The severity of neurological symptoms of the experimental animals was graded on a scale of 0'–5' according to methods described previously with slight modifications as follows: 0'-no neurological deficit; 1'-retracts left forepaw when lifted by the tail; 2'-circles to the left; 3'-falls while walking; 4'-does not walk spontaneously; 5'-dead. Neurological symptoms were evaluated 24 h after MCAO. The above behavioral observations were carried out in a blinded manner.

### 4. Measurement of infarct size

Coronal sections of the brain were cut into 2 mm slices and immersed in 2% 2,3,5-triphenyltetrazolium chloride (TTC; Sigma, USA) at 37°C for 15 min, followed by 10% formaldehyde solution. The image of each slice was captured by digital camera. The infarct area and hemisphere area were traced and quantitated by an image analysis system (Adobe ImageReady 7.0). Analysis of cerebral ischemic damage included total (hemispheric), cortical and subcortical (striatal) infarction.

## 5. Immunohistochemistry

For immunohistochemical analysis, rats were perfused with saline followed by 4% paraformaldehyde and immunohistochemistry was performed on 40  $\mu$ m free-floating sections using anti-NeuN monoclonal antibody (1:100, Millipore), anti-GFAP rabbit monoclonal antibody (1:400, Millipore), or CD11b monoclonal antibody (1:400, Abcam). Sections were then incubated with corresponding secondary antibodies and immunoreactivity was visualized with 0.05% DAB as chromagen. Negative controls received the same treatments omitting the primary antibodies and showed no specific staining.

## 6. Western blot analysis

The isolated cortex, hippocampus and striatum were homogenized in lysis buffer (20 mM Tris pH 7.5, 150 mM NaCl, 1% nonidet P-40, 0.5% sodium deoxycholate and protease inhibitor cocktail), centrifuged at 3,000 g for 10 min. Protein concentration was determined by BioRad protein assay. Samples were electrophoresed in SDS/PAGE gels and transferred onto a PVDF membrane. The membrane was blocked with 5% nonfat milk in 1×TBS, 0.1% Tween-20 at 25°C for 1 h and subsequently incubated overnight at 4°C with appropriate primary antibody (anti-iNOS, anti-COX2, anti-5-LOX, anti-phospho-p38 MAPK, anti-phospho-ERK, anti-phospho-JNK, anti-NF- $\kappa$ B p65, anti-I $\kappa$ B $\alpha$ , anti-cytochrome *c*, anti-Bcl-2 and anti-Bax were purchased from Santa Cruz, Abcam or Cell Signaling) diluted in TBST [TBS, 0.1% (v/v) Tween-20 and 5% (w/v) BSA]. After incubated with horseradish peroxidase-conjugated secondary antibodies for 1 h, the blots were developed with chemiluminescence reagent.

## 7. Measurement of plasma TNF $\alpha$ and IL-1 $\beta$ levels

Plasma TNF $\alpha$  and IL-1 $\beta$  levels were measured using enzyme-linked immunosorbent assay (ELISA) kit (purchased from ExCell) according to manufacturer's recommendations.

## 8. Measurement of mRNA levels of TNF $\alpha$ and IL-1 $\beta$ in the brain

Total RNA was extracted using Trizol reagent (Invitrogen Life technologies, USA) followed by treatment with RNase-free DNaseI (Invitrogen Life technologies, USA). Reverse transcription was performed with the One-Step RNA-PCR Kit (Takara), according to the manufacturer's protocol. PCR primers were as follows: glyceraldehyde-3-phosphate dehydrogenase (GAPDH) was used as housekeeping gene (forward 5'- CCTACCCC-CAATGTATCCGTTGTG-3' and reverse 5'- GGAG-GAATGGGAGTTGCTGTTGAA-3'), TNF- $\alpha$  (forward 5'- CGAGTGACAAGCCCGTAG-3' and reverse 5'- GGATGAA-CACGCCAGTCG-3'), IL1 $\beta$  (forward 5'- CCAGGATGAG-GACCCAAGCA-3' and reverse 5'- TCCCGAC-CATTGCTGTTTCC-3'). Quantitative real-time PCR was performed on a 7300 Real-Time PCR System using the SYBR Green PCR Master Mix. The samples were run in triplicate and the experiments were repeated at least three times. The GAPDH gene was used as an endogenous control to normalize for differences in the amount of total RNA in each sample. All values were expressed as fold increase or decrease relative to the expression of GAPDH.

## 9. Hippocampal primary neuron cultures

Primary neuron cultures were prepared from the hippocampal tissues of embryonic day 14/15 mice. Briefly cell were dissociated by trypsinization [0.25% (w/v) Trypsin and 0.02% EDTA in Ca<sup>2+</sup> and Mg<sup>2+</sup> free Hanks' balanced salt solution] at 37°C for 10 min,

followed by gentle triturating in plating medium (h-DMEM supplemented with 10% fetal bovine serum and 10% horse serum, Gibco-BRL). Cells were seeded onto poly-L-lysine (Sigma) -coated 24-well plates and 25-cm<sup>2</sup> T-flask at a density of  $2.5 \times 10^5$  cells per cm<sup>2</sup> and incubated at 37°C in 5% CO<sub>2</sub> atmosphere. After 18–24 h, after cells were adherenced, the medium was replaced by Neurobasal medium supplemented with 2% B-27 (Gibco-BRL) and 0.5 mM L-glutamine (Sigma) and treated with cytosine arabinoside (1  $\mu$ M) for 24 h to inhibit glial cell proliferation. Half of the culture medium was replaced every 3.5 days. Cultures were used after 7 days in vitro.

## 10. Analysis of cell viability

Cell viability was determined by use of an MTT assay. Cells were seeded in 96-well plates at  $1 \times 10^4$  cells per well and grown to 70% confluence in culture medium. The medium was replaced by medium containing TNF $\alpha$  (100  $\mu$ g/L) or TNF $\alpha$ +PF(25,50, 100  $\mu$ M) for 24 h. A total of 5 g/L MTT was added to each well after 24 h, and the culture continued to incubate for another 4 h at 37°C. Then the medium was aspirated, dye crystals were dissolved in DMSO and the absorbance was read on an ELISA plate reader using a 490 nm filter.

## 11. Hoechst 33342 staining

After treatment with TNF $\alpha$  (100  $\mu$ g/L) or TNF $\alpha$ +PF(50  $\mu$ M) for 24 h, the primary cultured neurons were fixed with 4% paraformaldehyde for 30 min at 25°C, then washed with pre-chilled phosphate buffer saline (PBS) three times and exposed to 10 mg/L Hoechst 33342 at room temperature in the dark for 10 min. Samples were observed under a fluorescence microscopy (Nikon Optical TE2000-S).

## 12. Statistics

For statistical analyses, a standard software package (SPSS for Windows 10.1) was used. All data were given as means  $\pm$  SD. Differences between groups were compared by using a one-way analysis of variance (ANOVA). *P* values < 0.05 were considered significant.

## Results

### 1. PF treatment improves neurological deficits and decreases cerebral infarct size in rats

Rats treated with vehicle showed neurological deficits such as retracting left forepaw when lifted by the tail, circling to the left or falling while walking. PF treatment significantly improved the neurological symptoms (Figure 1A). The neurological deficit score and the infarct volume of rats were determined to evaluate the impacts of PF treatment for 14 days after MCAO. TTC staining analysis revealed a mean infarct volume of  $250.1 \pm 17.2\%$  mm<sup>3</sup> in vehicle treated groups. Treatment with PF for 14 days significantly reduced the magnitude of ischemic lesion to  $106.0 \pm 11.7$  mm<sup>3</sup> (*P* < 0.01, Figure 1B and 1C). In addition, the neuroprotection of PF treatment were not to be accounted for by the modification of physiological variables, since the parameters (e.g. blood pH, pO<sub>2</sub>, pCO<sub>2</sub> and blood glucose) were kept within normal physiologic limit (Table 1).

### 2. PF treatment prevents ischemia-induced loss of neuron, and inhibits activations of microglia and astrocytes in the brain

As shown in Figure 2A and 2B, there was a robust loss of neurons in ipsilateral striatum and cortex after ischemia. However,

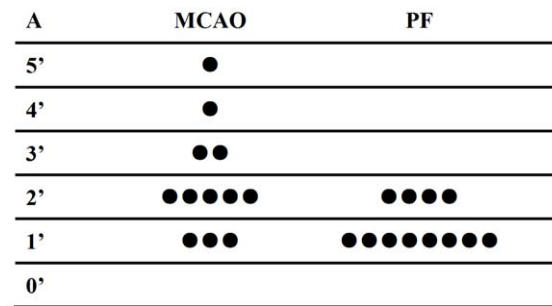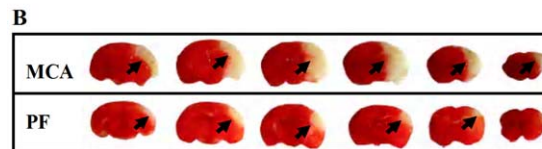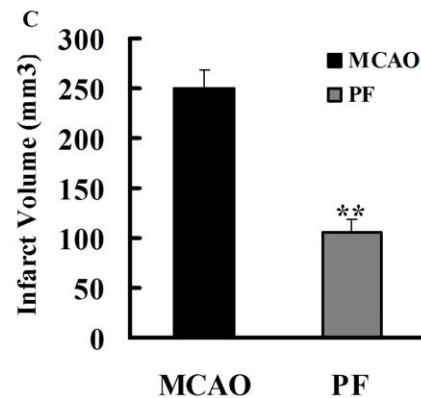

**Figure 1. Effects of PF on the size of cerebral infarct and the neurological deficits.** (A) The neurological score of MCAO groups and PF groups (n = 12). (B) Representative photographs showing the cerebral infarct of rat brain slices measured by 2, 3, 5-triphenyltetrazolium chloride (TTC) staining (n = 8). Black arrow indicated “infarcted area”. (C) The infarct volume of MCAO groups and PF groups. MCAO, rats treated with saline for 14 days after transient MCAO; PF, PF (5 mg·kg<sup>-1</sup>) was administered for 14 days after transient MCAO. All data were expressed as mean  $\pm$  SD. \*\**P* < 0.01 vs MCAO. doi:10.1371/journal.pone.0049701.g001

neuronal injury in striatum and cortex was significantly prevented by PF treatment.

After ischemia, astrocytes displayed reactive changes in cortex and striatum of vehicle treated groups which are characterized by increasing the expression of glial fibrillary acidic protein (GFAP) and the number of GFAP-positive cells. The number of astrocytes of MCAO-treated groups was higher than that of sham groups. PF treatment significantly inhibited the astrocytic activation in the brain (Figure 2C and 2D).

Ischemia also induced significantly activation of microglia which was characterized by changing the resting ramified types to the fully amoeboid morphology. The number of activated microglia and the soma volume of microglia were markedly increased induced by ischemia, which were inhibited by treatment with PF (Figure 2E and 2F).

**Table 1.** Physiologic parameters of rats before, during MCAO or 15 min after saline and PF treatment.

| Parameters               | Monitored time               | MCAO groups     | PF groups       |
|--------------------------|------------------------------|-----------------|-----------------|
| pH                       | before ischemia              | 7.35 $\pm$ 0.02 | 7.31 $\pm$ 0.02 |
|                          | during occlusion             | 7.34 $\pm$ 0.02 | 7.32 $\pm$ 0.02 |
|                          | 15 minutes after reperfusion | 7.37 $\pm$ 0.02 | 7.31 $\pm$ 0.01 |
| pCO <sub>2</sub> (mm Hg) | before ischemia              | 44.8 $\pm$ 2.5  | 46.8 $\pm$ 2.6  |
|                          | during occlusion             | 42.3 $\pm$ 1.6  | 44.8 $\pm$ 3.8  |
|                          | 15 minutes after reperfusion | 47.4 $\pm$ 3.1  | 47.8 $\pm$ 1.5  |
| pO <sub>2</sub> (mm Hg)  | before ischemia              | 85.5 $\pm$ 2.1  | 83.7 $\pm$ 2.4  |
|                          | during occlusion             | 42.3 $\pm$ 1.6  | 44.8 $\pm$ 3.8  |
|                          | 15 minutes after reperfusion | 81.0 $\pm$ 2.2  | 85.5 $\pm$ 1.9  |
| Blood glucose (mmol/L)   | before ischemia              | 11.0 $\pm$ 1.2  | 11.5 $\pm$ 1.9  |
|                          | during occlusion             | 11.5 $\pm$ 0.4  | 11.8 $\pm$ 0.6  |
|                          | 15 minutes after reperfusion | 10.8 $\pm$ 0.9  | 11.3 $\pm$ 0.5  |

Physiologic data obtained from control and drug-treated groups are presented as mean  $\pm$  SD. All animals were maintained at 37 $\pm$ 1°C. There were no statistically differences within or between the groups at any time point.  
doi:10.1371/journal.pone.0049701.t001

### 3. PF treatment decreases the levels of TNF $\alpha$ and IL-1 $\beta$ in plasma, down-regulates the protein expression levels of iNOS and COX<sub>2</sub> and 5-LOX in the brain

Ischemia and reperfusion resulted in 1.4-fold elevation in the concentrations of plasma interleukin 1 $\beta$  (IL-1 $\beta$ ) and 1.2-fold elevation in the concentrations of plasma tumor necrosis factor  $\alpha$  (TNF $\alpha$ ). Treatment with PF markedly decreased the IL-1 $\beta$  level to 39.7, and the TNF $\alpha$  level to 92.5, respectively (Figure 3).

Simultaneously, we determined the protein expressions of inducible nitric oxide synthase (iNOS), cyclooxygenase 2 (COX2) and 5-lipoxygenase (5-LOX) in the cortex, hippocampus and striatum via western blotting. The results showed that the protein levels of iNOS, COX<sub>2</sub> and 5-LOX in the brain of MCAO-injured groups were higher compared to those in the sham groups. PF treatment for 14 days significantly inhibited the three protein expressions in the brain (Figure 4).

### 4. PF treatment inhibited mRNA expressions of TNF $\alpha$ and IL-1 $\beta$ in the brain

We further observed the changes in mRNA levels of IL-1 $\beta$  and TNF $\alpha$  in brain by real-time PCR analysis. Our results showed that ischemia attack significantly up-regulated the mRNA levels of TNF $\alpha$  to 145%, 158% and 352% in cortex, hippocampus and striatum, respectively. The mRNA levels of IL-1 $\beta$  in the three brain regions were also robustly increased by ischemic injury to 359%, 223% and 747% in cortex, hippocampus and striatum, respectively. PF treatment reversed the increase of mRNA levels of TNF $\alpha$  (Figure 5A), and remarkably decreased the mRNA levels of IL-1 $\beta$  in cortex, hippocampus and striatum of rats (Figure 5B).

### 5. PF treatment regulates MAPK and NF- $\kappa$ B signalling pathway

Since MAPK signaling pathway plays important roles in inflammatory response, the effects of PF treatment on mitogen activated protein kinases (MAPKs) signaling pathways including extracellular signal-regulated kinase (ERK), Jun N-terminal kinase (JNK) as well as p38 MAPK were explored. Ischemia and reperfusion up-regulated the phosphorylations of JNK and p38 MAPK, but down-regulated ERK phosphorylation. Treatment with PF significantly suppressed the activations of JNK (Figure 6D)

and p38 MAPK (Figure 6B), but enhanced ERK activation (Figure 6C).

We further observed the ischemic injury-induced changes in the nuclear factor kappa B (NF- $\kappa$ B) signaling pathway. As shown in figure 6E and 6F, the expression of p65 was increased but ikappaB-alpha (I- $\kappa$ B $\alpha$ ) was significantly decreased by ischemic insult. These changes in pathway were reversed by PF treatment.

### 6. PF treatment down-regulates the expressions of cytochrome c and Bax, but up-regulates the expressions of Bcl-2

The pro-apoptotic protein Bax and the anti-apoptotic protein Bcl-2 are crucial determinants of the apoptotic response and also control the release of cytochrome c. To address whether PF treatment influences the expression of apoptosis-related proteins participated in ischemia and reperfusion. Western blot analysis revealed a significant increases in the protein levels of cytoplasmic cytochrome c and Bax in the cortex, hippocampus and striatum, whereas there was a marked decrease in Bcl-2 expression (Figure 7), indicating higher apoptosis existed in the ischemic brain. Chronic treatment with PF could prevent the increases of Bax and cytochrome c (Figure 7B and 7D) and significantly elevated the protein levels of Bcl-2 (Figure 7C).

### 7. PF treatment protects TNF $\alpha$ -induced cytotoxicity in hippocampal neurons

Many studies have been revealed that TNF $\alpha$  could activate both MAPKs and NF- $\kappa$ B signal pathways. So we used TNF $\alpha$  to induce inflammatory damage in hippocampal neurons, and to verify whether MAPKs and NF- $\kappa$ B signal pathways were involved in the neuroprotective effects of PF. After incubation with TNF $\alpha$ , the cell viability was decreased to 72.1%. Treatment with PF (25, 50, 100  $\mu$ M) decreased the cell death rate in a concentration-dependent manner (cell survival ratio was 81.2%, 87.1% and 92.3%, respectively. Figure 8A).

The Hoechst 33342 staining that is sensitive to DNA was used to assess changes in nuclear morphology following TNF $\alpha$  or TNF $\alpha$ +PF treatment. The nuclei in normal cells were normal and exhibited diffused staining of the chromatin. However, after exposure to TNF $\alpha$  100  $\mu$ g/L for 24 h, neurons underwent typical

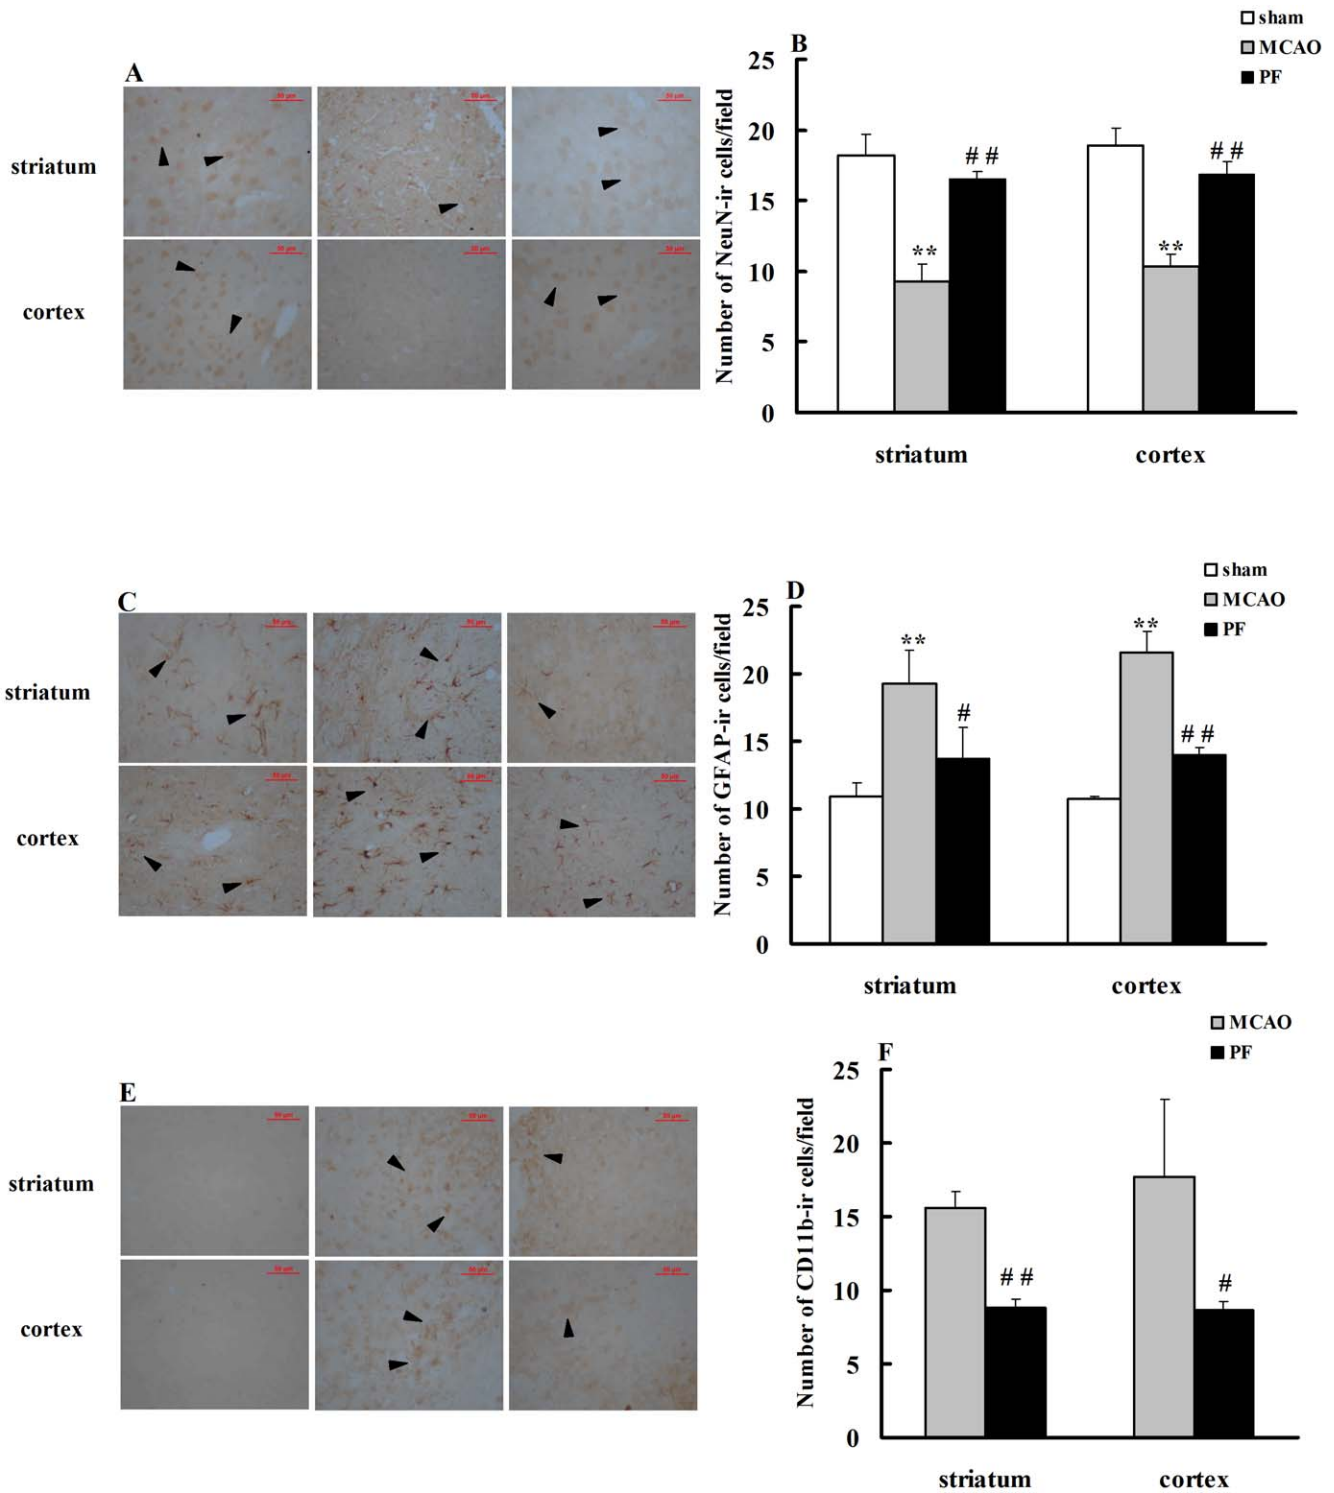

**Figure 2. PF treatment inhibits activations of astrocytes and microglia, and prevents the loss of neuron.** (A) Microphotographs of NeuN-ir cells in the cortex and striatum of rats with  $\times 40$  objective. (B) Stereological counts of NeuN-ir cells in the rat brain. Sham, rats received surgery without vessel occlusion. (C) Microphotographs of GFAP-ir cells in the cortex and striatum of rats with  $\times 40$  objective. (D) Stereological counts of GFAP-ir cells in the rat brain. Sham, rats received surgery without vessel occlusion; MCAO, rats treated with saline for 14 days after transient MCAO; PF, PF ( $5 \text{ mg} \cdot \text{kg}^{-1}$ ) was administered for 14 days after transient MCAO.  $n = 4-6$ . All data were expressed as mean  $\pm$  SD. Black arrows indicated the positive staining. \*  $P < 0.05$ , \*\*  $P < 0.01$  vs sham; #  $P < 0.05$ , ##  $P < 0.01$  vs MCAO. Scale bar,  $50 \mu\text{m}$ . doi:10.1371/journal.pone.0049701.g002

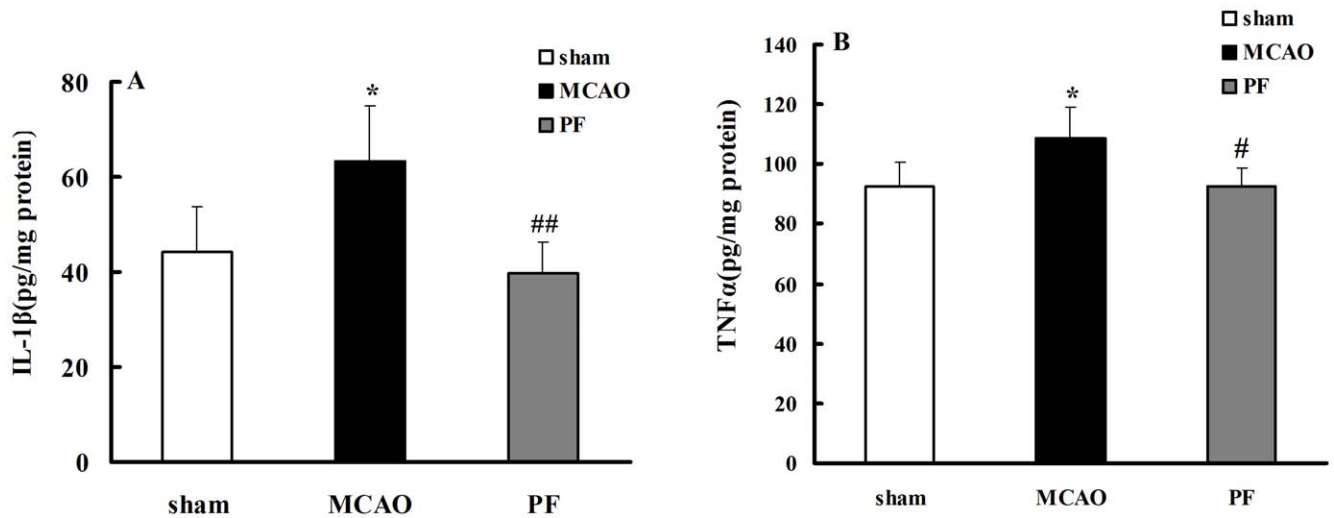

**Figure 3. PF treatment decreases the levels of IL-1β(A) and TNFα(B) in plasma.** Sham, rats received surgery without vessel occlusion; MCAO, rats treated with saline for 14 days after transient MCAO; PF, PF (5 mg. kg<sup>-1</sup>) was administered after MCAO for 14 days. n = 9. All data were expressed as mean ± SD. \* P<0.05, \*\* P<0.01 vs sham; #P<0.05, ##P<0.01 vs MCAO. doi:10.1371/journal.pone.0049701.g003

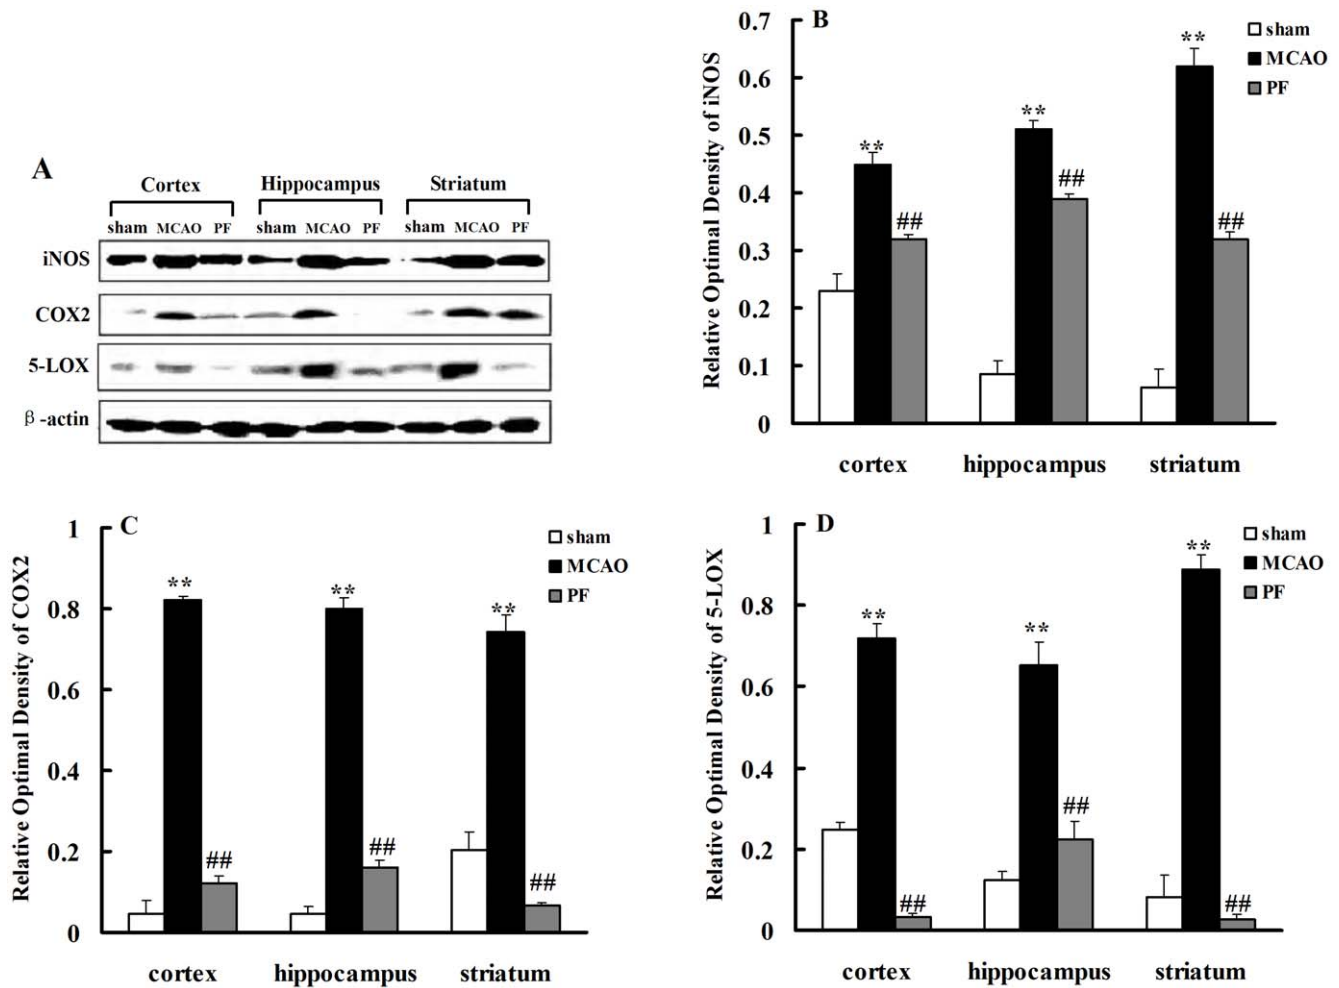

**Figure 4. PF treatment inhibits the protein expressions of iNOS, COX-2 and 5-LOX in the brain.** (A) represents the protein expression of iNOS, COX-2 and 5-LOX in the cortex, hippocampus and striatum of rats. (B–D) indicates the relative optical density of these proteins expression. Sham, rats received surgery without vessel occlusion; MCAO, rats treated with saline for 14 days after transient MCAO; PF, PF (5 mg. kg<sup>-1</sup>) was administered for 14 days after MCAO. n = 4. All data were expressed as mean ± SD. \*\* P<0.01 vs sham; ##P<0.01 vs MCAO. doi:10.1371/journal.pone.0049701.g004

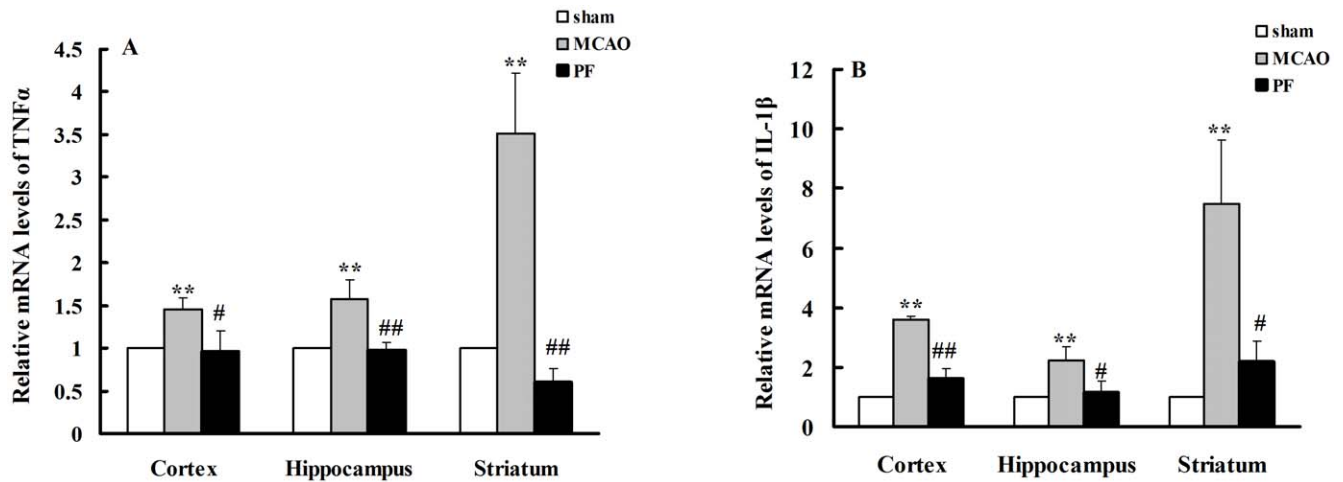

**Figure 5. PF treatment decreases the mRNA expressions of TNF $\alpha$  (A) and IL-1 $\beta$  (B) in the brain.** Sham, rats received surgery without vessel occlusion; MCAO, rats treated with saline for 14 days after transient MCAO; PF, PF (5 mg. kg $^{-1}$ ) was administered for 14 days after MCAO; n=4. All data were expressed as mean  $\pm$  SD. \*\*  $P < 0.01$  vs sham, #  $P < 0.05$ ; ##  $P < 0.01$  vs MCAO. doi:10.1371/journal.pone.0049701.g005

morphologic changes of apoptosis such as condensed chromatin and shrunken nucleus. Treatment with PF (50  $\mu$ M) almost reversed TNF $\alpha$ -induced neuronal apoptosis (Figure 8B and 8C).

## Discussion

An important delayed mechanism beginning within hours from the onset of ischemia is the robust inflammatory response in the ischemic tissue [5;28;29]. There is increasing evidence showing a detrimental effect of the post-ischemic inflammatory reaction. Therefore, therapeutic strategies targeting the delayed inflammatory response could inhibit the progression of the tissue damage providing an extended therapeutic window for neuroprotection.

Within hours after the onset of focal cerebral ischemia, peripheral leukocytes (granulocytes, monocytes/macrophages, lymphocytes) adhere to the cerebral endothelium, cross the vessel wall and invade the damaged parenchyma [28;30]. Activation and accumulation of leukocytes results in further damage. Current evidence suggests a detrimental role of iNOS and COX $_2$  from neutrophils and vascular cells in the ischemic brain [31]. iNOS is transcriptionally induced in the ischemic core generating toxic levels of NO continuously [32]. Inhibition of iNOS by pharmacological and genetic approaches prevents ischemia-induced neurodegeneration. For example, iNOS null mice were reported to have smaller infarcts and better neurological outcomes after focal ischemia [33]. In the present study, ischemia elicited significantly increased expressions of iNOS, COX2 and 5-LOX in three brain regions, PF treatment inhibited the overexpressions of the three proteins. Simultaneously, we found that levels of TNF $\alpha$  and IL-1 $\beta$  in the plasma were also increased, PF treatment significantly down-regulated the levels of the two inflammatory factors.

In response to ischemic injury in brain, microglia and astrocytes are activated [34]. Microglia are the resident macrophages of the brain. They are very sensitive to subtle alterations in their neuronal microenvironment. The surrounding astrocytes are also sensitive to the increased release of these immunomodulatory peptides and therefore severe ischemia also compromises astrocytic function [28;34]. In response to the ischemic injury, glial cells quickly become activated and undergo morphological transformations, and are accompanied by functional changes, such as

increasing expression of cytokines: interleukins (IL-1 $\beta$ , IL-4, IL-6, IL-10), TNF $\alpha$ , interferons and chemokines [35;36]. The accumulation of pro-inflammatory factors should further induce ischemic damages [35;37;38]. In the present study, we found ischemic insult resulted in over-activation of astrocytes and microglia, and thereby robustly elevated the mRNA expressions of TNF $\alpha$  and IL-1 $\beta$  in the brain. Chronic treatment with PF could inhibit glial over-activations, and reduce the mRNA levels of these inflammatory factors. Moreover, our other study via comparative proteomics analysis showed that ischemic injury substantially increased the expressions of astrocyte marker proteins (S100 $\beta$  and GFAP), PF treatment significantly reversed these changes (data not published). Therefore, our results reveal that PF exerts the delay neuroprotective effects via inhibiting peripheral and cerebral inflammatory response.

The secretion of inflammatory molecules in cerebral ischemia triggers the activation of several transcription factors involved in the inflammatory response [39]. Among them, the activation of NF- $\kappa$ B and subsequent degradation of I- $\kappa$ B $\alpha$  are the key events in ischemia and reperfusion [40]. The activated NF- $\kappa$ B further induces the expression of genes encoding cell adhesion molecules and cytokines, thereby triggering the vicious cycle and exacerbating inflammatory injury [7]. Our results demonstrated that ischemia caused the overexpression of p65 and decreased expression of its endogenous inhibitor I- $\kappa$ B $\alpha$ , while these changes were reversed by PF treatment. Consequently, inhibiting NF- $\kappa$ B activation by PF resulted in the down-regulations of IL-1 $\beta$  and TNF $\alpha$  mRNA levels in the brain.

MAPKs are a family of key proteins which are involved in a wide range of cell responses, including cell proliferation, differentiation and apoptosis [41]. MAPK signaling pathways also positively regulate transcription of inflammatory genes, such as those coding for TNF $\alpha$ , IL-1 $\beta$ , and COX2 [42]. Both the JNK pathway and pro-inflammatory mediators further potentiate the brain tissue injury and lead to apoptotic and necrotic cell death of the potential viable tissue within hours and days [35]. Inhibition of MAP kinases (MAPK), especially p38 and JNKs, could lead to a reduction in pro-inflammatory molecule production by inflammatory cells, especially microglia/macrophages in which the MAPK cascades are highly activated after an ischemic injury [43;44]. In contrast, activation of ERK signaling pathway was critical for

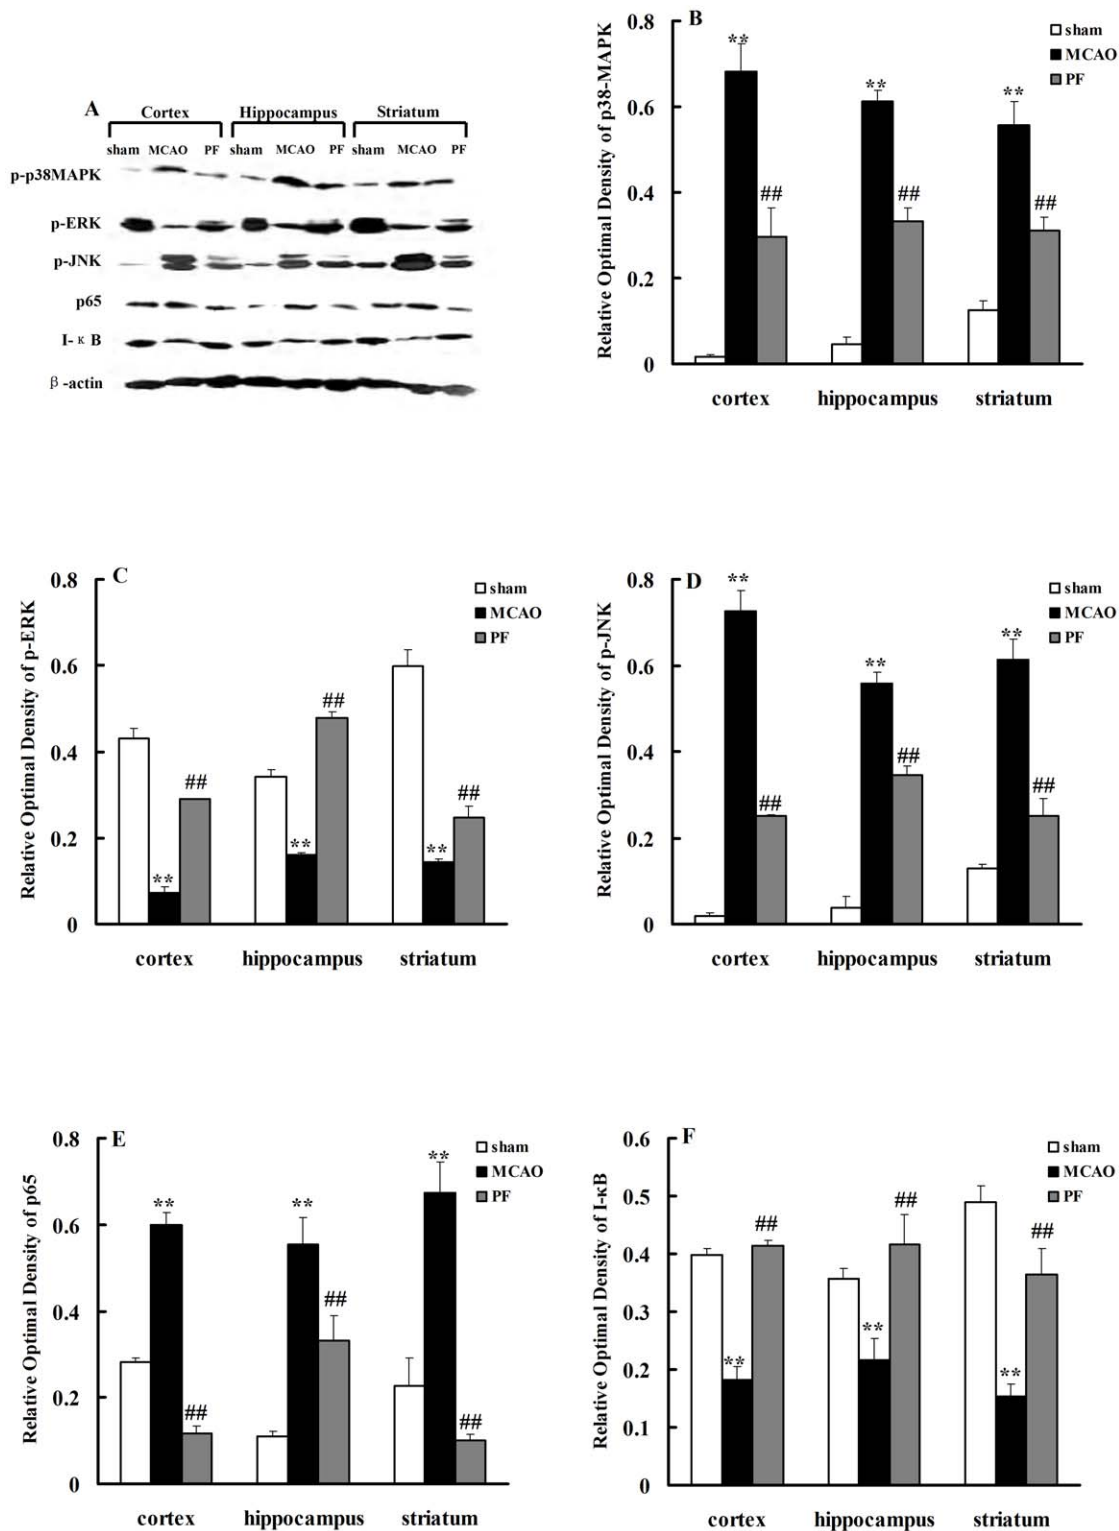

**Figure 6. Effects of PF on MAPK and NF-κB signaling effectors expression.** p-P38 MAPK, p-ERK, p-JNK, p65 and IκB protein expressions in the cortex, hippocampus and striatum of rats were indicated in (A). The relative optical densities were indicated in (B–F). Sham, rats received surgery without vessel occlusion; MCAO, rats treated with saline for 14 days after transient MCAO; PF, PF (5 mg. kg<sup>-1</sup>) was administered for 14 days after MCAO. n=4. All data were expressed as mean ± SD. \*\* P<0.01 vs sham; ##P<0.01 vs MCAO. doi:10.1371/journal.pone.0049701.g006

delayed neuroprotection [41;45]. We therefore investigated the effect of PF on the MAPK signaling pathways including JNK, p38 and ERK. We found that PF treatment potently restrained the

activation of p38 MAPK and JNK, which were reported persistently activated during ischemia [43;44]. The expression of phosphorylated ERK was inhibited by ischemia in our results,



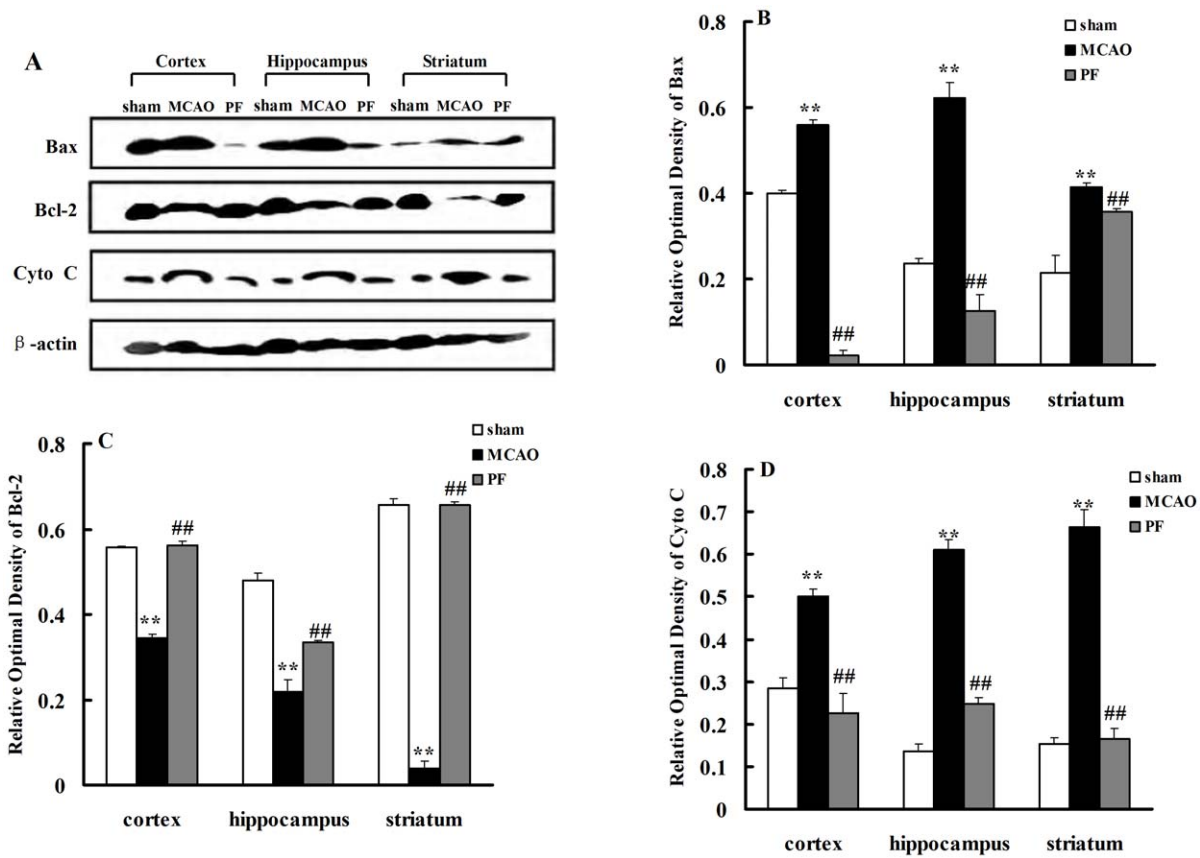

**Figure 7. PF treatment decreases expressions of cytochrome c and Bax, but increases the expressions of Bcl-2.** Cytochrome c, Bax and Bcl-2 protein expressions in the cortex, hippocampus and striatum of rats were indicated in (A). The relative optical densities were indicated in (B–D). Sham, rats received surgery without vessel occlusion; MCAO, rats treated with saline for 14 days after transient MCAO; PF, PF (5 mg. kg<sup>-1</sup>) was administered for 14 days after MCAO. n=4. All data were expressed as mean ± SD. \*\* P<0.01 vs sham; ##P<0.01 vs MCAO. doi:10.1371/journal.pone.0049701.g007

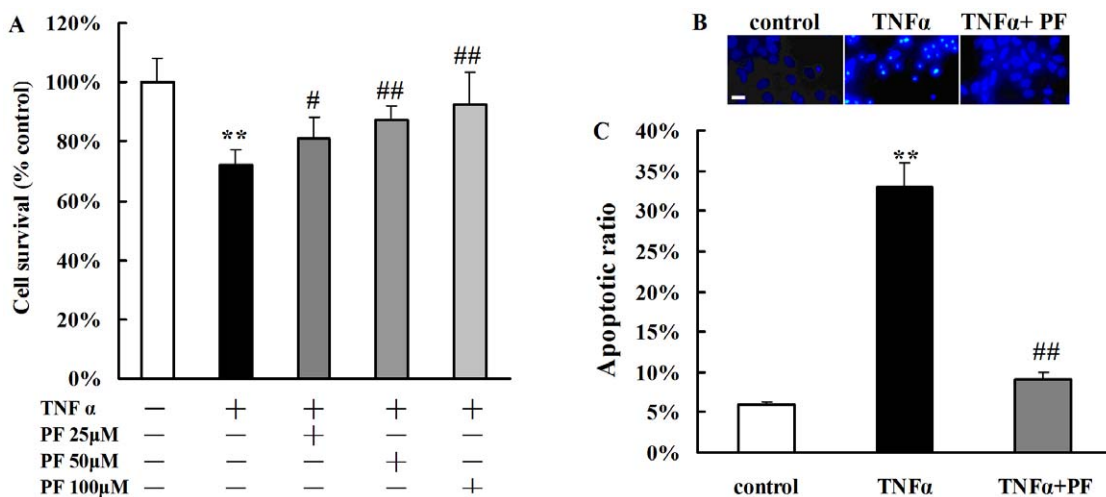

**Figure 8. PF treatment protects TNFα-induced cytotoxicity in hippocampal neurons as assessed by MTT(A) and staining with Hoechst33342 (B and C).** A and C. TNFα stimulation increased cell apoptosis and cell death in hippocampal neurons. PF inhibited the apoptotic ratio of neurons and promoted cell survival. B. Fluorescence photomicrographs of neurons with Hoechst 33342 staining. Bar = 50 μm. \*\*P<0.01 vs. control group, # P<0.05, ## P<0.01 vs. TNFα group. Data are means ± S.E.M. n = 4. doi:10.1371/journal.pone.0049701.g008

whereas PF treatment promoted its activation. Therefore, MAPK pathway is involved in the protective effects of PF.

Compelling evidence indicates that apoptosis is crucially important in transient cerebral ischemia [46]. A variety of cell death signals in ischemia affect mitochondria, so the central role of mitochondria in apoptosis has been widely accepted [47]. The Bcl-2 proteins are a family of mitochondrial proteins involved in the response to apoptosis. Some of these proteins (such as bcl-2 and bcl-XL) are anti-apoptotic, while others (such as Bad, Bax or Bid) are pro-apoptotic [48]. Our results showed that ischemic insult significantly increased Bax expression but decreased Bcl-2 expression. The sensitivity of cells to apoptotic stimuli depends on the balance of pro- and anti-apoptotic bcl-2 proteins [49]. The pro- and antiapoptotic members of the Bcl-2 family control the release of cytochrome *c* and other factors from mitochondria. The release of cytochrome *c* from the mitochondria is particularly important in the induction of apoptosis. Once cytochrome *c* has been released into the cytosol, it is able to interact with Apaf-1 that leads to the recruitment of pro-caspase 9 into a multi-protein complex and results in the formation of apoptosome [50]. In our study, the increased levels of cytoplasmic cytochrome *c* were found in the ischemic rat brain which indicated more severe apoptosis in ischemia-injured rats. Importantly, we found that PF treatment for 14 days could efficaciously prevent the changes in these apoptosis-related proteins, thereby protecting against ischemia-induced neuronal loss in the rats.

The pro-inflammatory cytokine TNF plays a key role in a wide variety of physiological processes, including inflammation, proliferation and programmed cell death [51]. These pleiotropic biological effects of TNF result from its ability to initiate different intracellular signaling pathways. TNF binding to TNF receptor 1

(TNF-R1) leads to the recruitment of TNF-R associated death domain (TRADD), TNF-R associated factor 2 (TRAF2), and receptor interacting protein 1 (RIP1), forming complex I [51]. Signaling from complex I leads to NF- $\kappa$ B activation via activation of the IKK complex [52]. Signaling from complex I also activates the p38, ERK and JNK MAP kinases [53]. Whereas recruitment of FADD and procaspase-8 results in the formation of the cytosolic complex II, where caspase-8 is activated. Caspase-8 initiates the mitochondrial pathway by cleaving Bid to tBid, which induces mitochondrial permeabilization that results in the release of cytochrome *c*. This initiates an amplification loop that results in full-blown caspase activity and subsequent apoptosis [51;52]. Therefore, TNF $\alpha$  was used to activate MAPKs and NF- $\kappa$ B signal pathways in our in vitro study. The results revealed that PF could significantly protect against TNF $\alpha$ -induced hippocampal neuron damage, suggesting that MAPKs and NF- $\kappa$ B signal pathways were involved in PF-mediated neuroprotective effects.

In conclusion, our data demonstrate that PF produces a delayed protective effect on ischemic injury in the rats via inhibiting peripheral and cerebral inflammatory response. The MAPKs and NF- $\kappa$ B signaling pathways are involved in the protective effects of PF. The present study reveals that PF might be a potential neuroprotective agent for stroke.

## Author Contributions

Conceived and designed the experiments: X-LS GH. Performed the experiments: R-BG G-FW A-PZ JG. Analyzed the data: A-PZ JG X-LS. Contributed reagents/materials/analysis tools: R-BG G-FW A-PZ JG. Wrote the paper: X-LS GH.

## References

- Auriel E, Bornstein NM (2010) Neuroprotection in acute ischemic stroke—current status. *J Cell Mol Med* 14(9):2200–2202.
- del Zoppo GJ (2010) The neurovascular unit, matrix proteases, and innate inflammation. *Ann N Y Acad Sci* 1207:46–49.
- Girouard H, Iadecola C (2006) Neurovascular coupling in the normal brain and in hypertension, stroke, and Alzheimer disease. *J Appl Physiol* 100(1):328–335.
- Mander P, Borutaite V, Moncada S, Brown GC (2005) Nitric oxide from inflammatory-activated glia synergizes with hypoxia to induce neuronal death. *J Neurosci Res* 79(1–2):208–215.
- Vexler ZS, Tang XN, Yenari MA (2006) Inflammation in adult and neonatal stroke. *Clin Neurosci Res* 6(5):293–313.
- Giulian D, Vaca K (1993) Inflammatory glia mediate delayed neuronal damage after ischemia in the central nervous system. *Stroke* 24(12 Suppl):I84–90.
- Denes A, Pinteaux E, Rothwell NJ, Allan SM (2011) Interleukin-1 and Stroke: Biomarker, Harbinger of Damage, and Therapeutic Target. *Cerebrovasc Dis* 32(6):517–527.
- Moskowitz MA, Lo EH, Iadecola C (2010) The science of stroke: mechanisms in search of treatments. *Neuron* 67(2):181–198.
- Liu S, Levine SR, Winn HR (2010) Targeting ischemic penumbra: part I - from pathophysiology to therapeutic strategy. *J Exp Stroke Transl Med* 3(1):47–55.
- Grotta JC, Burgin WS, El-Mitwalli A, Long M, Campbell M, et al. (2001) Intravenous tissue-type plasminogen activator therapy for ischemic stroke: Houston experience 1996 to 2000. *Arch Neurol* 58(12):2009–2013.
- Uchino K, Alexandrov AV, Garami Z, El-Mitwalli A, Morgenstern LB, et al. (2005) Safety and feasibility of a lower dose intravenous TPA therapy for ischemic stroke beyond the first three hours. *Cerebrovasc Dis* 19(4):260–266.
- Jahan R, Vinuela F (2009) Treatment of acute ischemic stroke: intravenous and endovascular therapies. *Expert Rev Cardiovasc Ther* 7(4):375–387.
- Barone FC (2009) Ischemic stroke intervention requires mixed cellular protection of the penumbra. *Curr Opin Investig Drugs* 10(3):220–223.
- Nizamutdinova IT, Jin YC, Kim JS, Yean MH, Kang SS, et al. (2008) Paeonol and paeoniflorin, the main active principles of *Paonia albiflora*, protect the heart from myocardial ischemia/reperfusion injury in rats. *Planta Med* 74(1):14–18.
- Hung JY, Yang CJ, Tsai YM, Huang HW, Huang MS (2008) Antiproliferative activity of paeoniflorin is through cell cycle arrest and the Fas/Fas ligand-mediated apoptotic pathway in human non-small cell lung cancer A549 cells. *Clin Exp Pharmacol Physiol* 35(2):141–147.
- Kimura M, Kimura I, Nojima H (1985) Depolarizing neuromuscular blocking action induced by electropharmacological coupling in the combined effect of paeoniflorin and glycyrrhizin. *Jpn J Pharmacol* 37(4):395–399.
- Tabata K, Matsumoto K, Watanabe H (2000) Paeoniflorin, a major constituent of peony root, reverses muscarinic M1-receptor antagonist-induced suppression of long-term potentiation in the rat hippocampal slice. *Jpn J Pharmacol* 83(1):25–30.
- Xiao L, Wang YZ, Liu J, Luo XT, Ye Y, et al. (2005) Effects of paeoniflorin on the cerebral infarction, behavioral and cognitive impairments at the chronic stage of transient middle cerebral artery occlusion in rats. *Life Sci* 78(4):413–420.
- Mao QQ, Zhong XM, Feng CR, Pan AJ, Li ZY, et al. (2010) Protective effects of paeoniflorin against glutamate-induced neurotoxicity in PC12 cells via antioxidant mechanisms and Ca(2+) antagonism[J]. *Cell Mol Neurobiol* 30(7):1059–1066.
- Sun R, Lv LL, Liu GQ (2006) [Effects of paeoniflorin on cerebral energy metabolism, nitric oxide and nitric oxide synthase after cerebral ischemia in mongolianerbils]. *Zhongguo Zhong Yao Za Zhi* 31(10):832–835.
- Ye J, Duan H, Yang X, Yan W, Zheng X (2001) Anti-thrombosis effect of paeoniflorin: evaluated in a photochemical reaction thrombosis model in vivo. *Planta Med* 67(8):766–767.
- Zhang XJ, Chen HL, Li Z, Zhang HQ, Xu HX, et al. (2009) Analgesic effect of paeoniflorin in rats with neonatal maternal separation-induced visceral hyperalgesia is mediated through adenosine A(1) receptor by inhibiting the extracellular signal-regulated protein kinase (ERK) pathway. *Pharmacol Biochem Behav* 94(1):88–97.
- Chen DM, Xiao L, Cai X, Zeng R, Zhu XZ (2006) Involvement of multitargets in paeoniflorin-induced preconditioning. *J Pharmacol Exp Ther* 319(1):165–180.
- Lai CW, Hsu FL, Cheng JT (1998) Stimulatory effect of paeoniflorin on adenosine A-1 receptors to increase the translocation of protein kinase C (PKC) and glucose transporter (GLUT 4) in isolated rat white adipocytes. *Life Sci* 62(17–18):1591–1595.
- Liu J, Jin DZ, Xiao L, Zhu XZ (2006) Paeoniflorin attenuates chronic cerebral hypoperfusion-induced learning dysfunction and brain damage in rats. *Brain Res* 1089(1):162–170.
- Liu DZ, Xie KQ, Ji XQ, Ye Y, Jiang CL, et al. (2005) Neuroprotective effect of paeoniflorin on cerebral ischemic rat by activating adenosine A1 receptor in a manner different from its classical agonists. *Br J Pharmacol* 146(4):604–611.

27. He X, Xing D, Ding Y, Li Y, Xu L, et al. (2004) Effects of cerebral ischemia-reperfusion on pharmacokinetic fate of paeoniflorin after intravenous administration of Paeoniae Radix extract in rats. *J Ethnopharmacol* 94(2–3):339–44.
28. Wang Q, Tang XN, Yenari MA (2007) The inflammatory response in stroke. *J Neuroimmunol* 184(1–2):53–68.
29. Sekiguchi M, Takagi K, Takagi N, Date I, Takeo S, et al. (2005) Time course and sequence of pathological changes in the cerebellum of microsphere-embolized rats. *Exp Neurol* 191(2):266–275.
30. Yang M, Wei X, Li J, Heine LA, Rosenwasser R, et al. (2010) Changes in host blood factors and brain glia accompanying the functional recovery after systemic administration of bone marrow stem cells in ischemic stroke rats. *Cell Transplant* 19(9):1073–1084.
31. Yermakova A, O'Banion MK (2000) Cyclooxygenases in the central nervous system: implications for treatment of neurological disorders. *Curr Pharm Des* 6(17):1755–1776.
32. Sinn DI, Lee ST, Chu K, Jung KH, Kim EH, et al. (2007) Proteasomal inhibition in intracerebral hemorrhage: neuroprotective and anti-inflammatory effects of bortezomib. *Neurosci Res* 58(1):12–18.
33. Cho S, Park EM, Zhou P, Frys K, Ross ME, et al. (2005) Obligatory role of inducible nitric oxide synthase in ischemic preconditioning. *J Cereb Blood Flow Metab* 25(4):493–501.
34. Willis CL (2011) Glia-induced reversible disruption of blood-brain barrier integrity and neuropathological response of the neurovascular unit. *Toxicol Pathol* 39(1):172–185.
35. Kaushal V, Schlichter LC (2008) Mechanisms of microglia-mediated neurotoxicity in a new model of the stroke penumbra. *J Neurosci* 28(9):2221–2230.
36. Pickering M, O'Connor JJ (2007) Pro-inflammatory cytokines and their effects in the dentate gyrus. *Prog Brain Res* 163:339–354.
37. Barone FC, Parsons AA (2000) Therapeutic potential of anti-inflammatory drugs in focal stroke. *Expert Opin Investig Drugs* 9(10):2281–2306.
38. Batti L, O'Connor JJ (2010) Tumor necrosis factor- $\alpha$  impairs the recovery of synaptic transmission from hypoxia in rat hippocampal slices. *J Neuroimmunol* 218(1–2):21–27.
39. Tang Y, Lu A, Aronow BJ, Wagner KR, Sharp FR (2002) Genomic responses of the brain to ischemic stroke, intracerebral haemorrhage, kainate seizures, hypoglycemia, and hypoxia. *Eur J Neurosci* 15(12):1937–52.
40. Ridder DA, Schwanninger M (2009) NF- $\kappa$ B signaling in cerebral ischemia. *Neuroscience* 158(3):995–1006.
41. Irving EA, Barone FC, Reith AD, Hadingham SJ, Parsons AA (2000) Differential activation of MAPK/ERK and p38/SAPK in neurons and glia following focal cerebral ischaemia in the rat. *Brain Res Mol Brain Res* 77(1):65–75.
42. Maddahi A, Edvinsson L (2010) Cerebral ischemia induces microvascular pro-inflammatory cytokine expression via the MEK/ERK pathway. *J Neuroinflamm* 7:14.
43. Barone FC, Irving EA, Ray AM, Lee JC, Kassir S, et al. (2001) Inhibition of p38 mitogen-activated protein kinase provides neuroprotection in cerebral focal ischemia. *Med Res Rev* 21(2):129–145.
44. Piao CS, Kim JB, Han PL, Lee JK (2003) Administration of the p38 MAPK inhibitor SB203580 affords brain protection with a wide therapeutic window against focal ischemic insult. *J Neurosci Res* 73(4):537–544.
45. Wang ZQ, Wu DC, Huang FP, Yang GY (2004) Inhibition of MEK/ERK 1/2 pathway reduces pro-inflammatory cytokine interleukin-1 expression in focal cerebral ischemia. *Brain Res* 996(1):55–66.
46. Adrie C, Monchi M, Fulgencio JP, Cottias P, Haouache H, et al. (2010) Immune status and apoptosis activation during brain death. *Shock* 33(4):353–362.
47. Vosler PS, Graham SH, Wechsler LR, Chen J (2009) Mitochondrial targets for stroke: focusing basic science research toward development of clinically translatable therapeutics. *Stroke* 40(9):3149–3155.
48. Fong WH, Tsai HD, Chen YC, Wu JS, Lin TN (2010) Anti-apoptotic actions of PPAR- $\gamma$  against ischemic stroke. *Mol Neurobiol* 41(2–3):180–186.
49. Wang T, Liu CZ, Yu JC, Jiang W, Han JX (2009) Acupuncture protected cerebral multi-infarction rats from memory impairment by regulating the expression of apoptosis related genes Bcl-2 and Bax in hippocampus. *Physiol Behav* 96(1):155–161.
50. Perez-Paya E, Orzacz M, Mondragon L, Wolan D, Wells JA, et al. (2011) Molecules that modulate Apaf-1 activity. *Med Res Rev* 31(4):649–675.
51. Bradley JR (2008) TNF-mediated inflammatory disease. *J Pathol* 214: 149–160.
52. Wullaert A, Heyninck K, Beyaert R (2006) Mechanisms of crosstalk between TNF-induced NF- $\kappa$ B and JNK activation in hepatocytes. *Biochem Pharmacol* 72: 1090–1101.
53. Jijon HB, Buret A, Hirota CL, Hollenberg MD, Beck PL (2012) The EGF receptor and HER2 participate in TNF- $\alpha$ -dependent MAPK activation and IL-8 secretion in intestinal epithelial cells. *Mediat of Inflamm* 2012: doi:10.1155/2012/207398.
